# Supplementary material for: Optimising psoriatic arthritis therapy with immunological methods to increase standard evaluation: the protocol of an open-label multicentre, parallel-group, two-arm randomised controlled study evaluation precision medicine approach in the treatment of psoriatic arthritis
Source: PubMed Central journal article supplement — BMJ Open. 2023 Sep 28;13(9):e078539. doi: 10.1136/bmjopen-2023-078539 (PMC10546161; doi:10.1136/bmjopen-2023-078539), 2023-09-28
Supplement: bmjopen-2023-078539.reviewer_comments.pdf [file bmjopen-2023-078539.reviewer_comments.pdf]

## PEER REVIEW HISTORY

BMJ Open publishes all reviews undertaken for accepted manuscripts. Reviewers are asked to complete a checklist review form (<http://bmjopen.bmj.com/site/about/resources/checklist.pdf>) and are provided with free text boxes to elaborate on their assessment. These free text comments are reproduced below.

## ARTICLE DETAILS

|                            |                                                                                                                                                                                                                                                                                   |
|----------------------------|-----------------------------------------------------------------------------------------------------------------------------------------------------------------------------------------------------------------------------------------------------------------------------------|
| <b>TITLE (PROVISIONAL)</b> | Optimising Psoriatic Arthritis Therapy with Immunological Methods to Increase Standard Evaluation: The protocol of an open-label multi-centre, parallel-group, two arm randomised controlled study evaluation precision medicine approach in the treatment of psoriatic arthritis |
| <b>AUTHORS</b>             | Ooms, Alexander; Al-Mossawi, Hussein; Bennett, Louise; Bogale, Mimi; Bowness, Paul; Francis, Anne; Goodyear, Carl; Kirkham, Bruce W; Lalnunhlmi, Sylvine; McInnes, Iain; Richards, Duncan; Siebert, Stefan; Taams, Leonie S.; Tulunay Virlan, Aysin; Yager, Nicole; Coates, Laura |

This article was not externally reviewed at BMJ Open. Protocols that have been independently assessed prior to submission to BMJ Open are usually fast-tracked to publication on the grounds that further substantial changes will not be possible. This independent assessment will usually be external, independent review for both a substantial grant award from a non-commercial or government funder and ethics approval.
